# Supplementary material for: Water in the ball-milling process affects the dispersion of vanadia species on V2O5/TiO2 catalysts for NH3-SCR
Source: Royal Society of Chemistry journal article supplement (doi:10.1039/d2nj04919h), 2022-12-06
Supplement: d2nj04919h1.pdf [file d2nj04919h1.pdf]

## **Water in ball-milling process affects the dispersion of vanadia species on V<sub>2</sub>O<sub>5</sub>/TiO<sub>2</sub> catalysts for NH<sub>3</sub>-SCR**

Zhihua Lian<sup>1</sup>, Mingji Zheng<sup>2,3</sup>, Qiang Wang<sup>2</sup>, Yingjie Li<sup>1,3</sup>, Feng Deng<sup>2</sup>, Wenpo  
Shan<sup>1,4,\*</sup>, Hong He<sup>1,3,5,\*</sup>

1. Center for Excellence in Regional Atmospheric Environment and Key Laboratory of Urban Pollutant Conversion, Institute of Urban Environment, Chinese Academy of Sciences, Xiamen 361021, China

2. State Key Laboratory of Magnetic Resonance and Atomic and Molecular Physics, Wuhan Center for Magnetic Resonance, Innovation Academy for Precision Measurement Science and Technology, the Chinese Academy of Sciences, Wuhan 430071, China

3. University of Chinese Academy of Sciences, Beijing 100049, China

4. Zhejiang Key Laboratory of Urban Environmental Processes and Pollution Control, Ningbo Urban Environment Observation and Research Station, Institute of Urban Environment, Chinese Academy of Sciences, Ningbo 315800, China

5. State Key Joint Laboratory of Environment Simulation and Pollution Control, Research Center for Eco-Environmental Sciences, Chinese Academy of Sciences, Beijing 100085, China

## Experimental

### 1 Catalyst preparation

The 1.0 wt.% V<sub>2</sub>O<sub>5</sub>/TiO<sub>2</sub> catalysts were synthesized by a ball-milling method adopting NH<sub>4</sub>VO<sub>3</sub> as the vanadium precursor. NH<sub>4</sub>VO<sub>3</sub>, H<sub>2</sub>O (when needed), and TiO<sub>2</sub> (DT-51, Millennium Chemicals) were mixed with several 5- and 10-mm diameter sintered alumina grinding balls in a grinding jar. A QM-3SP2 planetary ball mill was used to carry out the milling procedure at 30 Hz for 1 h. The resulting powders were dried at 100 °C overnight and then calcined at 500 °C for 4 h. The catalyst without H<sub>2</sub>O participating in the milling process was denoted as VTi-1, and the one with H<sub>2</sub>O (1 ml H<sub>2</sub>O / 6 g TiO<sub>2</sub>) was denoted as VTi-2.

### 2 Catalytic activity test

The activity tests were performed in a fixed-bed quartz flow reactor with 0.15 mL of the catalyst (40-60 mesh). The reaction gas consisted of 500 ppm NH<sub>3</sub> and NO, 5% O<sub>2</sub>, balanced with N<sub>2</sub>. The total flow rate was 500 mL min<sup>-1</sup>, with a gas hourly space velocity (GHSV) of 100 000 h<sup>-1</sup>. The concentrations of NO, NO<sub>2</sub>, N<sub>2</sub>O, and NH<sub>3</sub> were continuously analyzed by a Fourier transform infrared gas analyzer (Thermo Fisher IGS) equipped with a 2 m gas cell.

### 3 Catalyst characterization

NH<sub>3</sub> temperature-programmed desorption (NH<sub>3</sub>-TPD) and H<sub>2</sub> temperature-programmed reduction (H<sub>2</sub>-TPR) were conducted using the procedures reported in our previous works.<sup>1</sup> Nuclear magnetic resonance spectroscopy (NMR) and *in situ* diffuse reflectance infrared Fourier transform spectroscopy (DRIFTS) were carried out using the procedures reported in our previous works.<sup>2</sup>

## Results

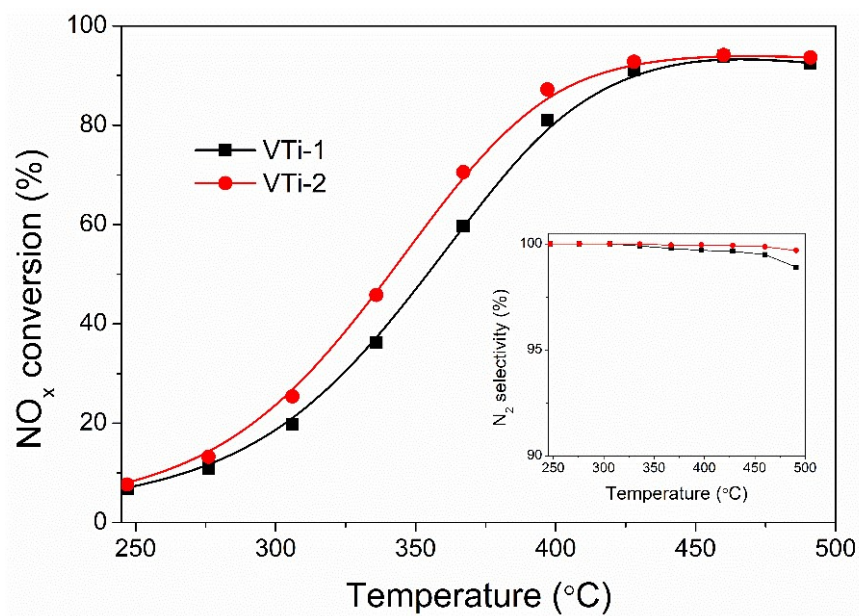

Figure S1. NH<sub>3</sub>-SCR activity over vanadia-based catalysts in the presence of water. Reaction conditions: [NO]=500 ppm, [NH<sub>3</sub>]=500 ppm, [H<sub>2</sub>O]=5%, [O<sub>2</sub>]=5%, balance N<sub>2</sub>, GHSV=100 000 h<sup>-1</sup>.

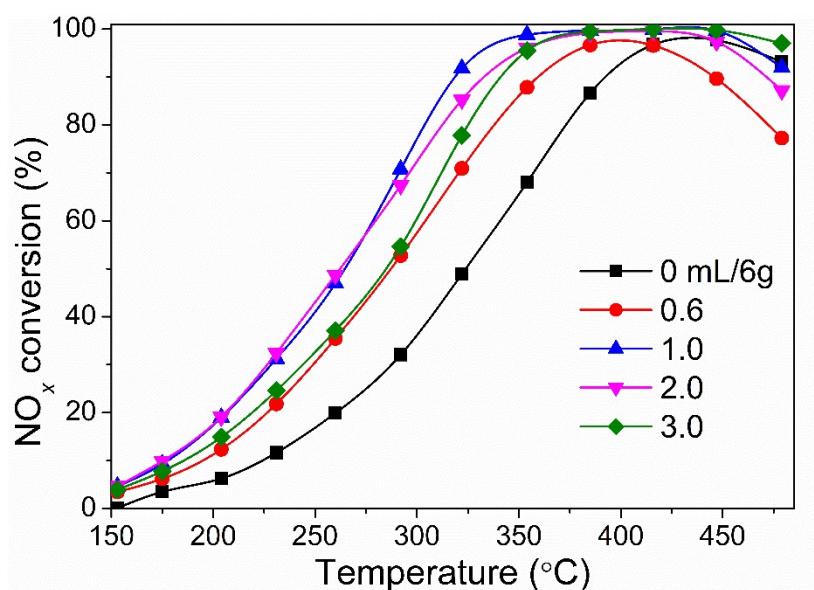

Figure S2 NO<sub>x</sub> conversion over vanadia-based catalysts with different amount of water in ball-milling process.

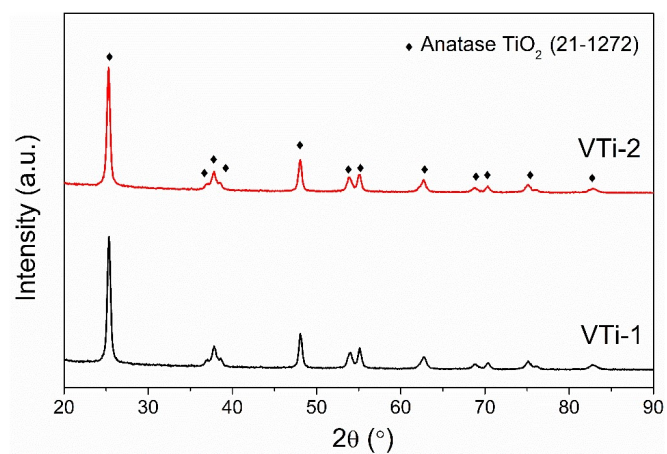

Figure S3. XRD results of vanadia-based catalysts.

Table S1. N<sub>2</sub> physisorption results of vanadia-based catalysts.

| Catalysts | Specific surface area | Average pore diameter | Pore volume |
|-----------|-----------------------|-----------------------|-------------|
| VTi-1     | 66.40                 | 15.78                 | 0.293       |
| VTi-2     | 67.74                 | 13.52                 | 0.259       |

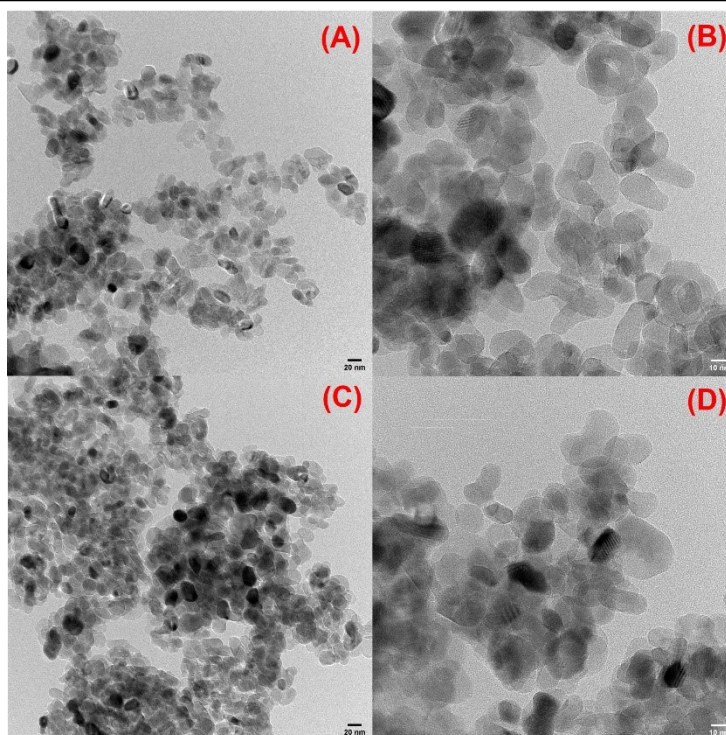

Figure S4 TEM images of VTi-1 (A, B) and VTi-2 (C, D).

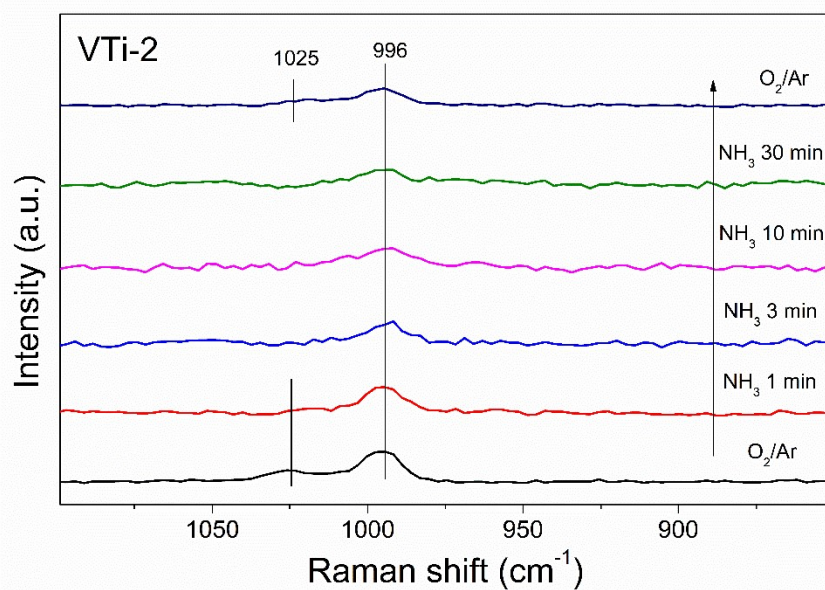

Figure S5. In situ Raman spectra of VTi-2 under different atmosphere at 200 °C.

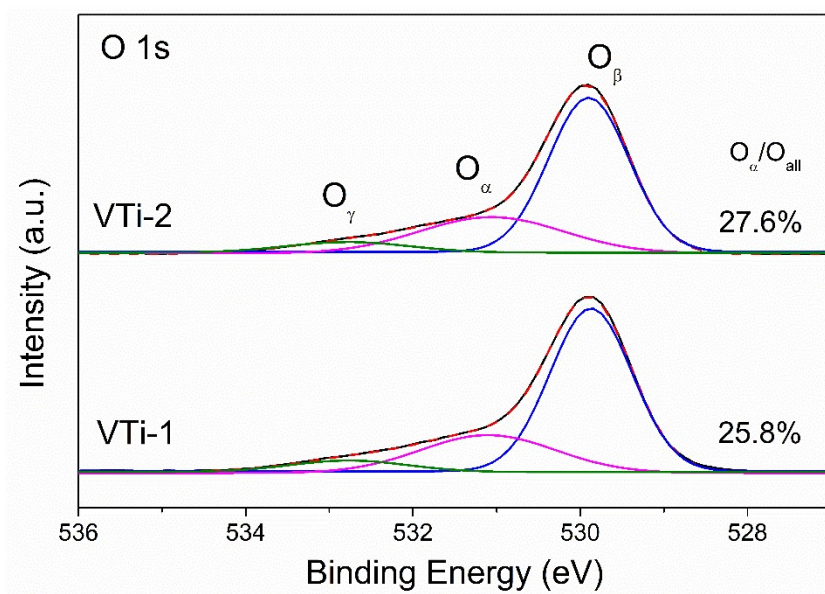

Figure S6. XPS results of O 1s on vanadia-based catalysts.



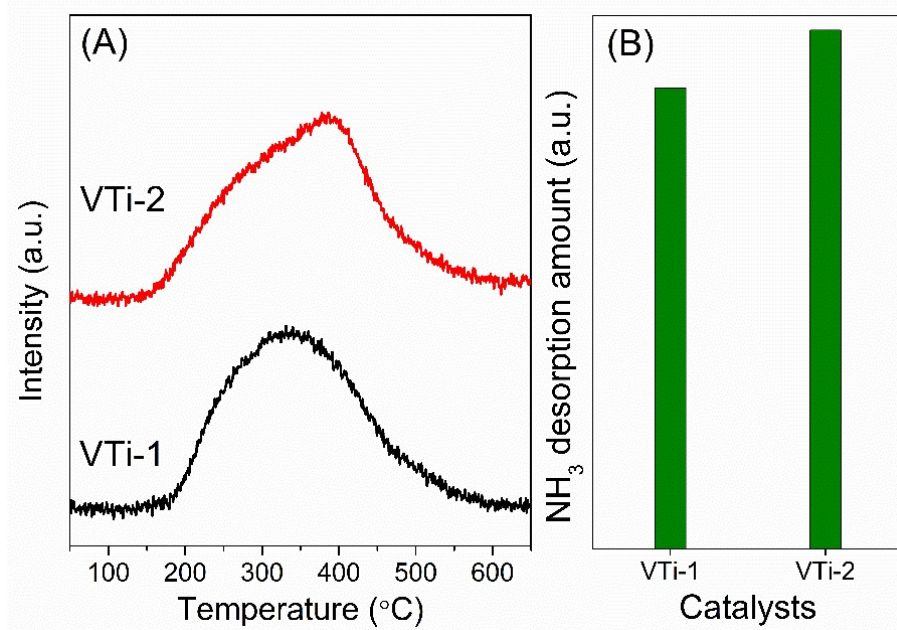

Figure S7.  $\text{NH}_3$ -TPD results (A) and  $\text{NH}_3$  desorption amount (B) of vanadia-based catalysts.

## References

1. Z. Lian, J. Wei, W. Shan, Y. Yu, P. M. Radjenovic, H. Zhang, G. He, F. Liu, J. F. Li, Z. Q. Tian and H. He, *J. Am. Chem. Soc.*, 2021, **143**, 10454-10461.
2. G. He, Z. Lian, Y. Yu, Y. Yang, K. Liu, X. Shi, Z. Yan, W. Shan and H. He, *Sci. Adv.*, 2018, **4**, eaau4637.
